# Supplementary material
Source: PubMed Central journal article supplement (PMC2869012)
Supplement: mmc1.pdf [file mmc1.pdf]

*AJHG*, Volume 86

Supplemental Data

**Detecting Coevolution through Allelic Association  
between Physically Unlinked Loci**

Rori V. Rohlf, Willie J. Swanson, and Bruce S. Weir

Table S1. CLD-Based Permutation p Values between *ZP3R* and *ZP3*

|             |             | <b>ZP3</b>  |             |             |             |           |             |             |             |             |             |
|-------------|-------------|-------------|-------------|-------------|-------------|-----------|-------------|-------------|-------------|-------------|-------------|
|             |             | rs2868371   | rs2908192   | rs6978009   | rs10156094  | rs1860148 | rs868269    | rs4728710   | rs1019096   | rs2110465   | rs2298691   |
| <b>ZP3R</b> | rs3813948   | 0.62        | 0.13        | 0.13        | 0.38        | 0.41      | 0.49        | 0.34        | 0.57        | 0.22        | 0.30        |
|             | rs8942      | 0.06        | <b>0.02</b> | <b>0.02</b> | 0.15        | 0.70      | <b>0.01</b> | 0.13        | 0.76        | 0.09        | 0.14        |
|             | rs11120211  | 0.89        | 0.26        | 0.30        | 0.24        | 0.27      | 0.15        | 0.19        | 0.22        | 0.16        | 0.24        |
|             | rs2491393   | <b>0.02</b> | 0.07        | 0.06        | 0.45        | 0.54      | 0.28        | 0.53        | 0.52        | 0.16        | 0.14        |
|             | rs2491395   | <b>0.00</b> | <b>0.01</b> | <b>0.01</b> | 0.06        | 0.99      | 0.24        | 0.07        | 0.23        | <b>0.03</b> | <b>0.04</b> |
|             | rs4844573   | <b>0.03</b> | 0.11        | 0.09        | 0.47        | 0.59      | 0.28        | 0.57        | 0.58        | 0.23        | 0.18        |
|             | rs11120277  | 0.43        | 0.46        | 0.46        | <b>0.02</b> | 0.38      | 0.32        | <b>0.02</b> | <b>0.03</b> | 0.45        | 0.57        |
|             | rs11120302  | 0.67        | 0.79        | 0.79        | <b>0.03</b> | 0.27      | 0.31        | <b>0.03</b> | 0.06        | 0.92        | 1.00        |
|             | rs17022385  | 0.51        | 0.55        | 0.55        | <b>0.02</b> | 0.33      | 0.31        | <b>0.02</b> | <b>0.04</b> | 0.63        | 0.70        |
|             | rs6672985   | 0.05        | <b>0.04</b> | <b>0.02</b> | 0.87        | 0.17      | 0.49        | 0.95        | 1.00        | 0.13        | 0.14        |
|             | rs1429907   | <b>0.04</b> | 0.06        | <b>0.04</b> | 0.88        | 0.14      | 0.68        | 0.95        | 0.92        | 0.12        | 0.13        |
|             | rs2012296   | 0.64        | 0.07        | 0.12        | <b>0.02</b> | 0.31      | 0.33        | <b>0.03</b> | 0.14        | 0.20        | 0.21        |
|             | rs1346720   | 0.14        | 0.38        | 0.28        | 0.21        | 0.10      | 0.32        | 0.23        | 0.46        | 0.35        | 0.33        |
|             | rs6673080   | 0.46        | 0.78        | 0.86        | 0.22        | 0.41      | 0.84        | 0.24        | 0.47        | 0.66        | 0.56        |
|             | rs10746450  | <b>0.03</b> | 0.40        | 0.30        | 0.59        | 0.07      | 0.50        | 0.60        | 0.57        | 0.15        | 0.11        |
|             | rs10746451  | <b>0.03</b> | 0.39        | 0.29        | 0.55        | 0.08      | 0.50        | 0.53        | 0.53        | 0.19        | 0.15        |
|             | rs7543834   | 0.85        | 0.19        | 0.25        | <b>0.03</b> | 0.33      | 0.33        | 0.06        | 0.24        | 0.30        | 0.29        |
|             | rs7516468   | 0.11        | 0.29        | 0.23        | 0.66        | 0.20      | 0.49        | 0.72        | 1.00        | 0.30        | 0.32        |
|             | rs7516640   | 0.09        | 0.24        | 0.19        | 0.67        | 0.19      | 0.49        | 0.72        | 1.00        | 0.26        | 0.28        |
|             | rs11120512  | 0.34        | 0.96        | 0.88        | 0.50        | 0.14      | 0.82        | 0.55        | 0.87        | 0.24        | 0.18        |
|             | rs2039544   | <b>0.03</b> | 0.33        | 0.24        | 0.63        | 0.06      | 0.50        | 0.61        | 0.77        | 0.21        | 0.19        |
|             | rs4844584   | <b>0.03</b> | 0.33        | 0.24        | 0.61        | 0.06      | 0.51        | 0.60        | 0.66        | 0.18        | 0.17        |
|             | rs10494890  | 0.36        | 0.86        | 0.79        | 0.52        | 0.17      | 0.83        | 0.59        | 0.98        | 0.35        | 0.28        |
| rs7545125   | 0.24        | 0.62        | 0.52        | 0.61        | 0.55        | 0.17      | 0.68        | 0.95        | 0.77        | 0.81        |             |
| rs7543236   | <b>0.03</b> | 0.33        | 0.25        | 0.75        | <b>0.04</b> | 0.50      | 0.73        | 0.73        | 0.19        | 0.17        |             |
| rs6658718   | 0.25        | 0.78        | 0.74        | 0.16        | 0.29        | 0.64      | 0.18        | 0.53        | 0.27        | 0.24        |             |

p values below 0.05 are bold.

Table S2. GA-Based Permutation p Values between *ZP3R* and *ZP3*

|             |            | <b>ZP3</b>  |             |             |             |           |             |             |           |           |
|-------------|------------|-------------|-------------|-------------|-------------|-----------|-------------|-------------|-----------|-----------|
|             |            | rs2868371   | rs2908192   | rs6978009   | rs10156094  | rs1860148 | rs4728710   | rs1019096   | rs2110465 | rs2298691 |
| <b>ZP3R</b> | rs3813948  | 0.92        | 0.43        | 0.36        | 0.91        | 0.41      | 0.86        | 0.14        | 0.67      | 0.73      |
|             | rs8942     | 0.21        | 0.21        | 0.20        | 0.52        | 1.00      | 0.50        | 0.72        | 0.43      | 0.67      |
|             | rs11120211 | 0.98        | 0.31        | 0.31        | 0.40        | 0.16      | 0.34        | 0.21        | 0.51      | 0.57      |
|             | rs2491393  | 0.05        | 0.07        | 0.07        | 0.49        | 0.52      | 0.47        | 0.28        | 0.50      | 0.36      |
|             | rs2491395  | <b>0.02</b> | <b>0.03</b> | <b>0.03</b> | 0.39        | 0.72      | 0.32        | 0.34        | 0.25      | 0.25      |
|             | rs4844573  | <b>0.05</b> | 0.08        | 0.09        | 0.50        | 0.50      | 0.47        | 0.26        | 0.58      | 0.43      |
|             | rs6672985  | 0.17        | 0.20        | 0.16        | 0.13        | 0.20      | 0.13        | 0.15        | 0.21      | 0.18      |
|             | rs1429907  | 0.12        | 0.23        | 0.18        | 0.11        | 0.14      | 0.12        | 0.07        | 0.32      | 0.29      |
|             | rs2012296  | 0.67        | 0.25        | 0.34        | 0.10        | 0.78      | 0.17        | 0.32        | 0.26      | 0.26      |
|             | rs1346720  | 0.20        | 0.69        | 0.66        | <b>0.01</b> | 0.13      | <b>0.01</b> | <b>0.01</b> | 0.56      | 0.44      |
|             | rs6673080  | 0.71        | 0.95        | 0.96        | 0.76        | 0.52      | 0.76        | 0.88        | 0.82      | 0.92      |
|             | rs10746450 | 0.20        | 0.08        | 0.08        | 0.49        | 0.28      | 0.52        | 0.34        | 0.33      | 0.23      |
|             | rs10746451 | 0.19        | 0.08        | 0.08        | 0.43        | 0.29      | 0.46        | 0.34        | 0.31      | 0.22      |
|             | rs7516468  | 0.28        | 0.36        | 0.33        | <b>0.04</b> | 0.44      | <b>0.04</b> | <b>0.01</b> | 0.59      | 0.58      |
|             | rs7516640  | 0.29        | 0.33        | 0.29        | <b>0.03</b> | 0.45      | <b>0.04</b> | <b>0.02</b> | 0.54      | 0.53      |
|             | rs11120512 | 0.81        | 0.93        | 0.92        | 0.79        | 0.24      | 0.79        | 0.52        | 0.67      | 0.49      |
|             | rs2039544  | 0.18        | 0.08        | 0.07        | 0.46        | 0.27      | 0.52        | 0.44        | 0.35      | 0.29      |
|             | rs4844584  | 0.19        | 0.08        | 0.07        | 0.49        | 0.25      | 0.53        | 0.45        | 0.36      | 0.31      |
|             | rs10494890 | 0.84        | 0.93        | 0.91        | 0.75        | 0.20      | 0.74        | 0.50        | 0.60      | 0.51      |
|             | rs7545125  | 0.29        | 0.62        | 0.58        | 0.17        | 0.71      | 0.16        | 0.06        | 0.32      | 0.17      |
| rs7543236   | 0.18       | 0.10        | 0.10        | 0.49        | 0.23        | 0.54      | 0.47        | 0.37        | 0.31      |           |
| rs6658718   | 0.47       | 0.70        | 0.70        | 0.64        | 0.74        | 0.65      | 0.56        | 0.44        | 0.41      |           |

p values below 0.05 are bold.

Table S3. CLD-Based Permutation p Values for Tag SNPs between *GHR* and *GH2*

|                   |            | <b><i>GH2</i></b> |             |             |             |
|-------------------|------------|-------------------|-------------|-------------|-------------|
|                   |            | rs2584622         | rs2854160   | rs12450683  | rs12946669  |
| <b><i>GHR</i></b> | rs1396775  | 0.14              | <b>0.00</b> | <b>0.00</b> | <b>0.03</b> |
|                   | rs17574527 | 0.53              | <b>0.02</b> | 0.10        | 0.22        |
|                   | rs17574616 | 0.47              | 0.11        | 0.31        | 0.28        |
|                   | rs2972419  | 0.62              | 0.62        | 0.42        | 0.51        |
|                   | rs6870962  | 0.27              | 0.34        | 0.35        | 0.35        |
|                   | rs2972393  | 0.34              | 0.19        | 0.32        | 0.38        |
|                   | rs11949751 | 0.29              | 0.08        | 0.06        | 0.12        |
|                   | rs4410646  | 0.69              | 0.50        | 0.87        | 0.58        |
|                   | rs7709790  | 0.22              | <b>0.04</b> | <b>0.01</b> | 0.15        |
|                   | rs12518067 | 0.30              | 0.10        | 0.06        | 0.38        |
|                   | rs6451634  | 0.55              | 0.18        | <b>0.04</b> | 0.24        |
|                   | rs4866796  | <b>0.04</b>       | 0.08        | 0.24        | 0.14        |
|                   | rs16872762 | <b>0.01</b>       | 0.69        | 0.95        | 0.36        |

p values below 0.05 are bold.

Table S4. GA-Based Permutation p Values for Tag SNPs between *GHR* and *GH2*

|                   |            | <b><i>GH2</i></b> |             |             |            |
|-------------------|------------|-------------------|-------------|-------------|------------|
|                   |            | rs2584622         | rs2854160   | rs12450683  | rs12946669 |
| <b><i>GHR</i></b> | rs1396775  | 0.17              | <b>0.03</b> | <b>0.05</b> | 0.21       |
|                   | rs17574527 | 0.82              | 0.18        | 0.54        | 0.19       |
|                   | rs17574616 | 0.88              | 0.45        | 0.24        | 0.41       |
|                   | rs2972419  | 0.16              | <b>0.03</b> | 0.39        | 0.37       |
|                   | rs2972393  | 0.67              | 0.72        | 0.23        | 0.69       |
|                   | rs11949751 | 0.65              | 0.40        | 0.17        | 0.30       |
|                   | rs4410646  | 0.56              | 0.61        | 0.95        | 0.92       |
|                   | rs7709790  | 0.51              | 0.08        | 0.10        | 0.07       |
|                   | rs12518067 | 0.32              | 0.16        | 0.12        | 0.16       |
|                   | rs6451634  | 0.73              | 0.54        | 0.29        | 0.12       |
|                   | rs4866796  | 0.29              | 0.44        | 0.22        | 0.28       |

p values below 0.05 are bold.

Figure S1. CLD and GA Test Statistic Distributions for *GHR-GH2*

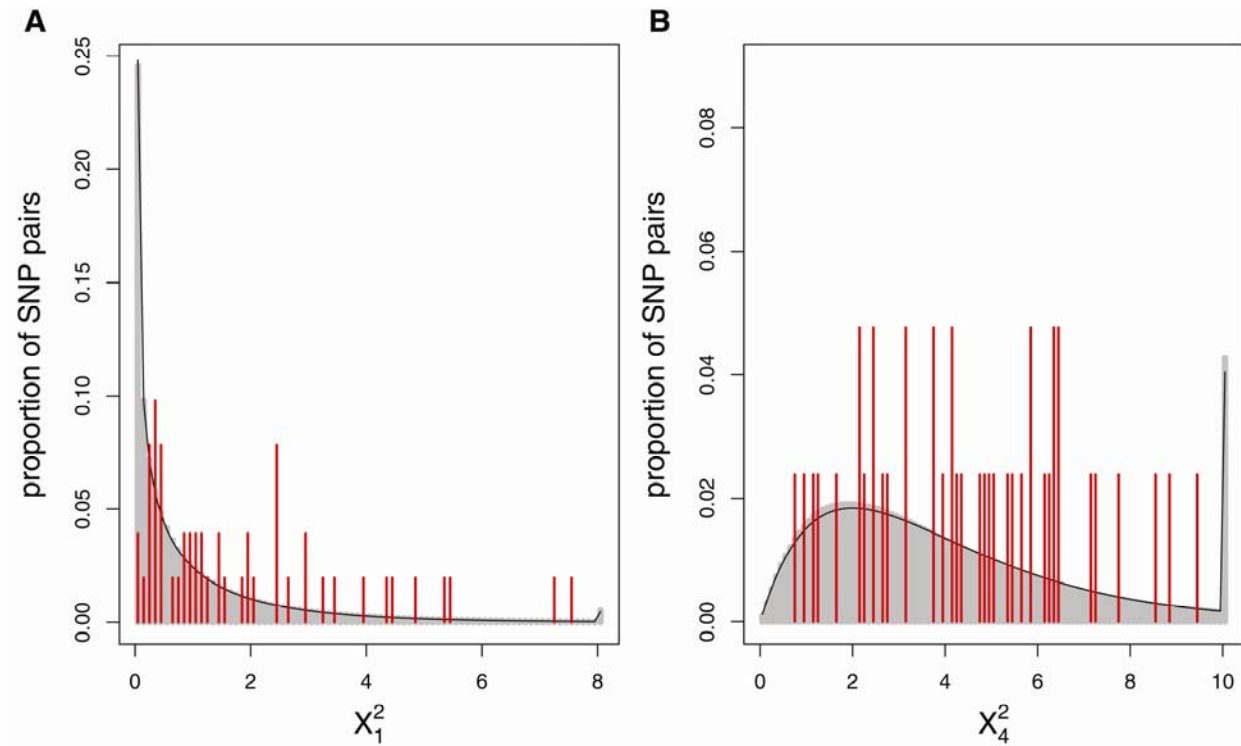

The black curve shows the asymptotically expected null test statistic distribution, the gray bars form histograms of the empirical distribution of the test statistics between all SNP pairs on chromosomes one and seven, and the red bars form histograms of test statistics between SNPs in *GHR* and *GH2* for (a)  $X_1^2$  and (b)  $X_4^2$ .
